# Supplementary material for: Transcriptomic alterations during ageing reflect the shift from cancer to degenerative diseases in the elderly
Source: PubMed Central journal article supplement (PMC5790807; doi:10.1038/s41467-017-02395-2), 2018-01-30
Supplement: 41467_2017_2395_MOESM3_ESM.pdf [file 41467_2017_2395_MOESM3_ESM.pdf]

## **Description of Supplementary Files**

File Name: Supplementary Data 1

Description: Information about samples, data on the multi-species comparison for processes that were identified as being consistently changed across species, AMDA-scores as well as DAC scores, data of the longitudinal analysis and shared risk SNPs between ageing diseases.

File Name: Supplementary Data 2

Description: Information about ageing-associated transcriptional changes for all considered processes, differentially regulated genes for ageing as well as disease analyses, disease alignment analyses.
